# Supplementary material for: Investigation of the functional relationship between antecedent rainfall and the probability of debris flow occurrence in Jiangjia Gully, China
Source: Copernicus journal article supplement (doi:10.5194/hess-28-2343-2024), 2024-06-04
Supplement: Supplementary file 1 [file hess-28-2343-2024-supplement.zip]

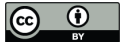

*Supplement of*

**Investigation of the functional relationship between antecedent rainfall and the probability of debris flow occurrence in Jiangjia Gully, China**

**Shaojie Zhang et al.**

*Correspondence to:* Kaiheng Hu (khhu@imde.ac.cn) and Fanqiang Wei (fqwei@cigit.ac.cn)

- hess-28-2343-2024-supplement-title-page.pdf
- Table S1-1094 rainfall and 37 debris flow data.xlsx
- Table S2-f(D)and CFD(D).xlsx
- Table S3-Draing the piecewise functions of Pdf AEP.xlsx

The copyright of individual parts of the supplement might differ from the article licence.
