# Supplementary material for: Investigation of the functional relationship between antecedent rainfall and the probability of debris flow occurrence in Jiangjia Gully, China
Source: Copernicus journal article supplement (doi:10.5194/hess-28-2343-2024), 2024-06-04
Supplement: Supplementary file 3 [file Table S3-Draing the piecewise functions of Pdf~AEP.xlsx]

## Sheet: Sheet1
AEP (mm)	1.2 g/cm3			2.2 g/cm3			Calculated Probability of debris flow
	α from Table 1	β from Table 1	Dmax from Table 1	α from Table 1	β from Table 1	Dmax from Table 1
10	19.85	-0.54	269	15.85	-0.48	263
15	21.69	-0.55	236	16.1	-0.5	229	0.79
20	23.22	-0.58	203	17.2	-0.53	192	0.89
25	24.47	-0.6	171	16.92	-0.53	160	1.16
30	26.24	-0.64	143	18.09	-0.57	132	1.33
35	35.47	-0.65	123	19.55	-0.58	112	2.62
40	40.59	-0.78	103	22.15	-0.64	92	2.13
45	41.12	-0.78	83	23.19	-0.69	72	2.95
50	41.26	-0.86	65	23.5	-0.74	55	3.11
55	38.63	-0.88	53	23.31	-0.7	42	2.48
60	31.49	-0.92	40	20.73	-0.86	30	4.88
65	29.14	-0.95	32	18.1	-0.91	22	7
70	23.05	-0.96	25	13.04	-0.93	15	10.04
75	21.13	-0.97	22	10.9	-0.95	12	12.28
80	18.72	-0.98	20	9.96	-0.95	11	12.71
85	18.47	-0.99	18	8.17	-0.95	9	15.88
90	16.99	-0.98	18	6.81	-0.95	7	17.59
100	16.9	-0.98	18	6.81	-0.95	7	17.55
110	16.87	-0.98	16	6.76	-0.95	7	18.96
120	16.87	-0.98	16	6.76	-0.95	7	18.96
130	16.87	-0.98	16	6.76	-0.95	7	18.96
	AEP	Pdf
	10	0.39
	15	0.79
	20	0.89
	25	1.16
	30	1.33
	35	2.62
	40	2.13
	45	2.95
	50	3.11
	55	2.48
	60	4.88
	65	7
	70	10.04
	75	12.28
	80	12.71
	85	15.88
